# Supplementary material
Source: PubMed Central journal article supplement (PMC3508731)
Supplement: NIHMS420110-supplement-cb300076s_si_001.pdf [file NIHMS420110-supplement-cb300076s_si_001.pdf]

## Supporting Information

### Deciphering Structural Elements of Mucin Glycoprotein Recognition

**Authors:** Andrew Borgert,<sup>†</sup> Jamie Heimbarg-Molinaro<sup>‡</sup> Xuezheng Song,<sup>‡</sup> Yi Lasanajak,<sup>‡</sup> Tongzhong Ju,<sup>‡</sup> Mian Liu,<sup>#</sup> Pamela Thompson,<sup>#</sup> Govind Ragupathi,<sup>&</sup> George Barany,<sup>^</sup> David F. Smith,<sup>‡</sup> Richard D. Cummings,<sup>‡,\*</sup> and David Live<sup>#,\*</sup>

<sup>†</sup>Center for Magnetic Resonance Research, University of Minnesota, Minneapolis, MN 55455

<sup>‡</sup>Department of Biochemistry, Emory University, Atlanta, GA 30322

<sup>#</sup>Complex Carbohydrate Research Center, University of Georgia, Athens, GA 30602

<sup>&</sup>Memorial Sloan-Kettering Cancer Center, New York, NY 10065

<sup>^</sup>Department of Chemistry, University of Minnesota, Minneapolis, MN 55455

## Supporting Information: Results and Discussion

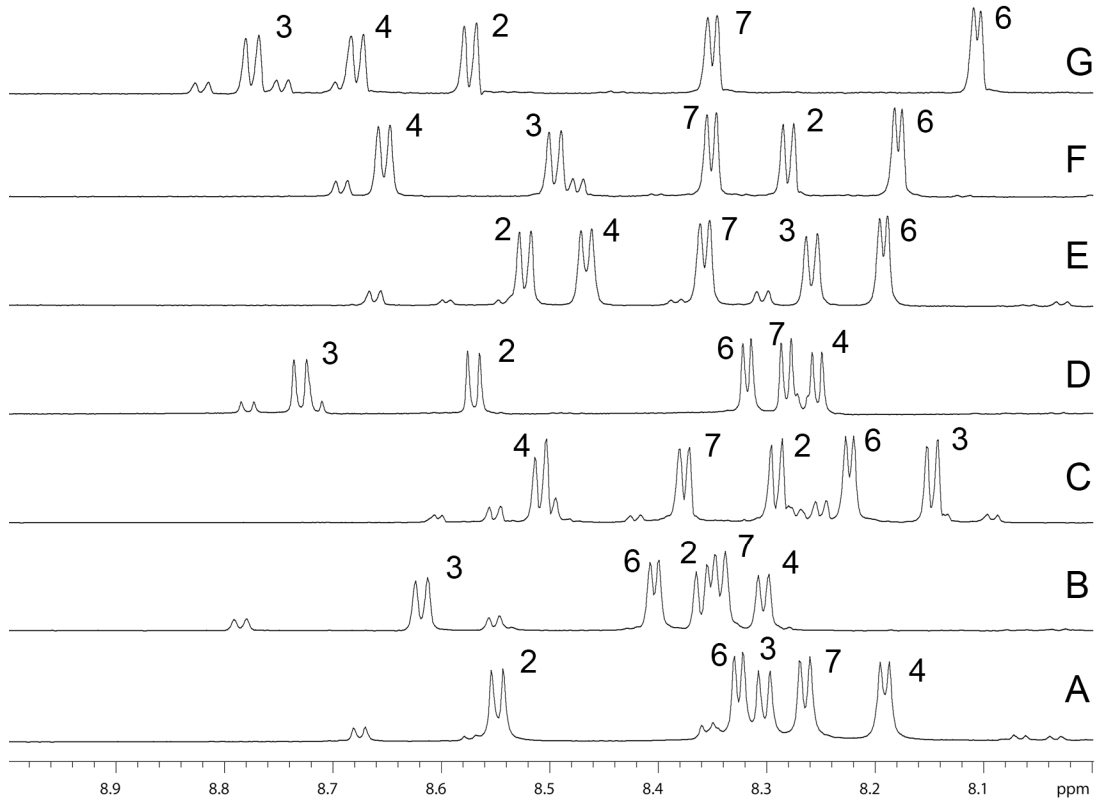

**Figure S1.** 800 MHz <sup>1</sup>H NMR of the peptide amide region of the glycopeptide constructs A through G in 90% H<sub>2</sub>O/10% D<sub>2</sub>O. Watergate solvent suppression<sup>1</sup> was used. Small peaks arise from the minor proline cis amide bond forms.

**Table S1** Restraint Information, Deviations from Ideal Geometry and Structural Statistics related to Constructs A-G in Figure 2\*

**A** Structural Information PDB ID 2LHV

Distance Restraints

|                 |    |
|-----------------|----|
| Peptide-Peptide |    |
| Intra-residue:  | 49 |
| Inter-residue:  | 14 |
| Peptide-Sugar   |    |
| Proximal:       | 5  |
| Non-Proximal:   | 1  |
| Sugar-Sugar     |    |
| GalNAc-GalNAc   | 8  |
| Total:          | 77 |

<sup>3</sup>J Coupling Restraints: 5

Torsion Restraints: 7

Restraint Violations

|                            |   |
|----------------------------|---|
| NOE Violations (>.25 Å)    | 0 |
| J-Coup Violations (>.5 Hz) | 0 |
| Torsion Violations (>5°)   | 0 |

Deviations From Ideal Geometry

|              |                     |
|--------------|---------------------|
| Bond (Å):    | 0.00205 +/- 0.00006 |
| Angle (°):   | 0.472 +/- 0.019     |
| Improper (°) | 0.355 +/- 0.009     |

Average RMSD Over 78 Structures

|                         |                 |
|-------------------------|-----------------|
| Backbone Heavy Atoms    |                 |
| +Thr+GalNAc Heavy atoms | 2.000 +/- 0.662 |
| All Heavy Atoms         | 2.545 +/- 0.616 |

**B** Structural Information PDB ID 2LI2

Distance Restraints

|                 |    |
|-----------------|----|
| Peptide-Peptide |    |
| Intra-residue:  | 52 |
| Inter-residue:  | 20 |
| Peptide-Sugar   |    |
| Proximal:       | 9  |
| Non-Proximal:   | 4  |
| Sugar-Sugar     |    |
| GalNAc-GalNAc   | 9  |
| Total:          | 94 |

<sup>3</sup>J Coupling Restraints: 5

Torsion Restraints: 7

Restraint Violations

|                            |   |
|----------------------------|---|
| NOE Violations (>.25 Å)    | 0 |
| J-Coup Violations (>.5 Hz) | 0 |
| Torsion Violations (>5°)   | 0 |

Deviations From Ideal Geometry

|              |                     |
|--------------|---------------------|
| Bond (Å):    | 0.00208 +/- 0.00012 |
| Angle (°):   | 0.472 +/- 0.011     |
| Improper (°) | 0.363 +/- 0.011     |

Average RMSD Over 36 Structures

|                         |                 |
|-------------------------|-----------------|
| Backbone Heavy Atoms    |                 |
| +Thr+GalNAc Heavy atoms | 2.049 +/- 0.617 |
| All Heavy Atoms         | 2.530 +/- 0.656 |

**Figure S2** Overlay of all heavy atoms of T3, T4, and T5 core with associated GalNAcs for all accepted structures A-G. T3 to the right.

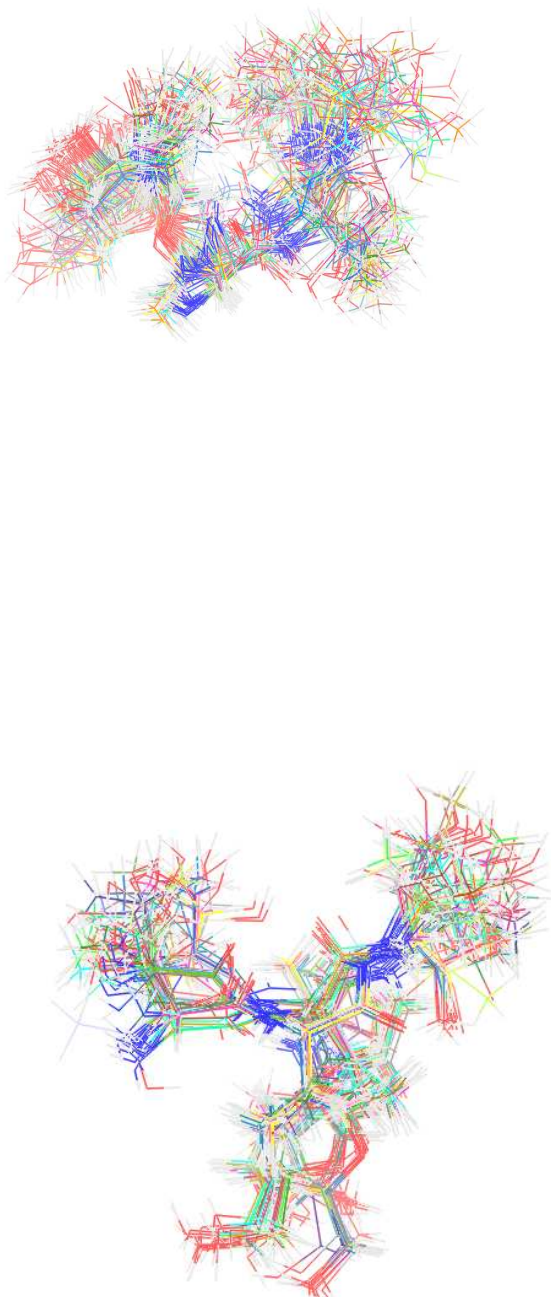

### C Structural Information PDB ID 2LI1

|                                     |                     |
|-------------------------------------|---------------------|
| Distance Restraints                 |                     |
| Peptide-Peptide                     |                     |
| Intra-residue:                      | 56                  |
| Inter-residue:                      | 20                  |
| Peptide-Sugar                       |                     |
| Proximal:                           | 8                   |
| Non-Proximal:                       | 6                   |
| Sugar-Sugar                         |                     |
| GalNAc-GalNAc                       | 9                   |
| Total:                              | 99                  |
| <sup>3</sup> J Coupling Restraints: | 5                   |
| Torsion Restraints:                 | 7                   |
| Restraint Violations                |                     |
| NOE Violations (>.25 Å)             | 0                   |
| J-Coup Violations (>.5 Hz)          | 0                   |
| Torsion Violations (>5°)            | 0                   |
| Deviations From Ideal Geometry      |                     |
| Bond (Å):                           | 0.00206 +/- 0.00013 |
| Angle (°):                          | 0.472 +/- 0.012     |
| Improper (°)                        | 0.377 +/- 0.018     |
| Average RMSD Over 74 Structures     |                     |
| Backbone Heavy Atoms                |                     |
| +Thr+GalNAc Heavy atoms             | 1.632 +/- 0.220     |
| All Heavy Atoms                     | 2.272 +/- 0.281     |

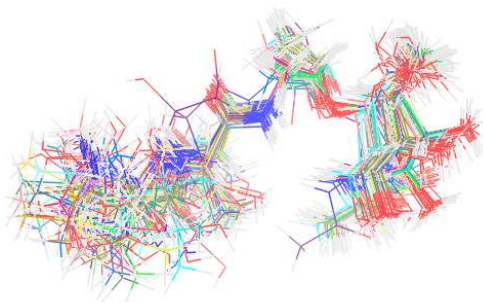

### D Structural Information PDB ID 2LI0

|                                     |                     |
|-------------------------------------|---------------------|
| Distance Restraints                 |                     |
| Peptide-Peptide                     |                     |
| Intra-residue:                      | 50                  |
| Inter-residue:                      | 21                  |
| Peptide-Sugar                       |                     |
| Proximal:                           | 19                  |
| Non-Proximal:                       | 8                   |
| Sugar-Sugar                         |                     |
| GalNAc-GalNAc                       | 10                  |
| Total:                              | 108                 |
| <sup>3</sup> J Coupling Restraints: | 5                   |
| Torsion Restraints:                 | 9                   |
| Restraint Violations                |                     |
| NOE Violations (>.25 Å)             | 0                   |
| J-Coup Violations (>.5 Hz)          | 0                   |
| Torsion Violations (>5°)            | 0                   |
| Deviations From Ideal Geometry      |                     |
| Bond (Å):                           | 0.00192 +/- 0.00013 |
| Angle (°):                          | 0.443 +/- 0.012     |
| Improper (°)                        | 0.358 +/- 0.009     |
| Average RMSD Over 49 Structures     |                     |
| Backbone Heavy Atoms                |                     |
| +Thr+GalNAc Heavy atoms             | 1.774 +/- 0.322     |
| All Heavy Atoms                     | 2.461 +/- 0.313     |

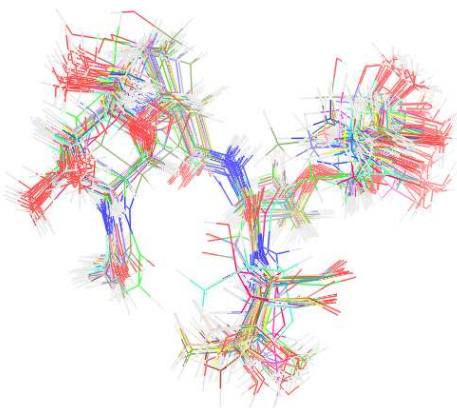

### E Structural Information PDB ID 2LHZ

|                                     |                     |
|-------------------------------------|---------------------|
| Distance Restraints                 |                     |
| Peptide-Peptide                     |                     |
| Intra-residue:                      | 44                  |
| Inter-residue:                      | 22                  |
| Peptide-Sugar                       |                     |
| Proximal:                           | 22                  |
| Non-Proximal:                       | 17                  |
| Sugar-Sugar                         |                     |
| GalNAc-GalNAc                       | 25                  |
| Total:                              | 130                 |
| <sup>3</sup> J Coupling Restraints: | 5                   |
| Torsion Restraints:                 | 9                   |
| Restraint Violations                |                     |
| NOE Violations (>.25 Å)             | 0                   |
| J-Coup Violations (>.5 Hz)          | 0                   |
| Torsion Violations (>5°)            | 0                   |
| Deviations From Ideal Geometry      |                     |
| Bond (Å):                           | 0.00193 +/- 0.00016 |
| Angle (°):                          | 0.447 +/- 0.016     |
| Improper (°)                        | 0.365 +/- 0.020     |
| Average RMSD Over 29 Structures     |                     |
| Backbone Heavy Atoms                |                     |
| +Thr+GalNAc Heavy atoms             | 1.262 +/- 0.296     |
| All Heavy Atoms                     |                     |
|                                     | 1.794 +/- 0.379     |

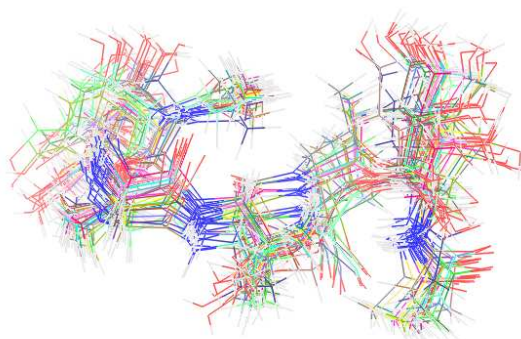

### F Structural Information PDB ID 2LHY

|                                     |                     |
|-------------------------------------|---------------------|
| Distance Restraints                 |                     |
| Peptide-Peptide                     |                     |
| Intra-residue:                      | 51                  |
| Inter-residue:                      | 22                  |
| Peptide-Sugar                       |                     |
| Proximal:                           | 21                  |
| Non-Proximal:                       | 13                  |
| Sugar-Sugar                         |                     |
| GalNAc-GalNAc                       | 15                  |
| Total:                              | 122                 |
| <sup>3</sup> J Coupling Restraints: | 5                   |
| Torsion Restraints:                 | 9                   |
| Restraint Violations                |                     |
| NOE Violations (>.25 Å)             | 0                   |
| J-Coup Violations (>.5 Hz)          | 0                   |
| Torsion Violations (>5°)            | 0                   |
| Deviations From Ideal Geometry      |                     |
| Bond (Å):                           | 0.00187 +/- 0.00006 |
| Angle (°):                          | 0.442 +/- 0.011     |
| Improper (°)                        | 0.665 +/- 0.014     |
| Average RMSD Over 24 Structures     |                     |
| Backbone Heavy Atoms                |                     |
| +Thr+GalNAc Heavy atoms             | 1.173 +/- 0.237     |
| All Heavy Atoms                     |                     |
|                                     | 1.787 +/- 0.408     |

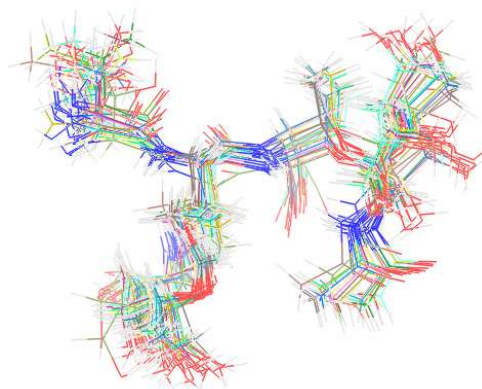

### G Structural Information PDB 2LHX

#### Distance Restraints

|                                     |                     |
|-------------------------------------|---------------------|
| Peptide-Peptide                     |                     |
| Intra-residue:                      | 36                  |
| Inter-residue:                      | 14                  |
| Peptide-Sugar                       |                     |
| Proximal:                           | 27                  |
| Non-Proximal:                       | 14                  |
| Sugar-Sugar                         |                     |
| GalNAc-GalNAc                       | 25                  |
| Total:                              | 116                 |
| <sup>3</sup> J Coupling Restraints: | 5                   |
| Torsion Restraints:                 | 11                  |
| Restraint Violations                |                     |
| NOE Violations (>.25 Å)             | 0                   |
| J-Coup Violations (>.5 Hz)          | 0                   |
| Torsion Violations (>5°)            | 0                   |
| Deviations From Ideal Geometry      |                     |
| Bond (Å):                           | 0.00179 +/- 0.00010 |
| Angle (°):                          | 0.423 +/- 0.014     |
| Improper (°)                        | 0.363 +/- 0.016     |
| Average RMSD Over 54 Structures     |                     |
| Backbone Heavy Atoms                |                     |
| +Thr+GalNAc Heavy atoms             | 1.250 +/- 0.262     |
| All Heavy Atoms                     | 1.664 +/- 0.417     |

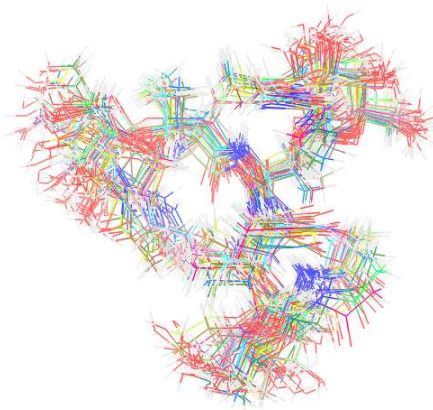

\*Some of the sugar-sugar NOEs are between protons attached to members of the sugar 6 atom skeleton that was held fixed in the calculations

| <b>Table S2 RDC Values, accuracy +/- 0.2 Hz</b> |        |       |        |        |
|-------------------------------------------------|--------|-------|--------|--------|
| construct                                       | D      | E     | F      | G      |
| P1 H $\alpha$ C $\alpha$                        | -7.8   | -4.9  | -4.6   | -5.3   |
| T2 H $\alpha$ C $\alpha$                        | -10.8* | -7.7* | -14.5  | -10.0* |
| T3 H $\alpha$ C $\alpha$                        | -10.6* | -9.0  | -15.4* | -10.5* |
| T4 H $\alpha$ C $\alpha$                        | -7.2   | -8.0* | -9.5*  | -6.6*  |
| P5 H $\alpha$ C $\alpha$                        | -5.8   | -0.7  | -2.5   | -3.2   |
| L6 H $\alpha$ C $\alpha$                        | -8.5   | -7.2  | -11.4  | -7.9   |
| K7 H $\alpha$ C $\alpha$                        | -6.7   | -4.9  | -10.7  | -7.2   |
| T2 H $\beta$ C $\beta$                          | 8.6*   | 5.2*  | < -0.5 | 7.4*   |
| T2 $\gamma$ 2ME                                 | 2.9*   | 2.2*  | 8.9    | 4.1*   |
| T3 H $\beta$ C $\beta$                          | 8.8*   | 4.3   | 15.2*  | 11.1*  |
| T3 $\gamma$ 2ME                                 | 3.9*   | 3.6   | 4.9*   | 4.3*   |
| T4 H $\beta$ C $\beta$                          | 1.0    | 11.1* | 13.9*  | 8.4*   |
| T4 $\gamma$ 2ME                                 | 5.6    | 1.0*  | 2.6*   | 0.9*   |
| G9 H1C1                                         | 6.4    | 5.3   | N/A    | 7.1    |
| GN10 H1C1                                       | 2.9    | N/A   | 9.0    | 6.7    |
| GN11 H1C1                                       | N/A    | 4.4   | 0.5    | 2.0    |
| T2 HN                                           | -6.4*  | -5.9* | -7.3   | -5.2*  |
| T3 HN                                           | -8.8*  | -7.3  | -12.1* | -8.3*  |
| T4 HN                                           | -7.0   | -8.5* | -13.1* | -9.2*  |
| L6 HN                                           | -4.2   | -5.0  | -7.0   | -6.7   |
| K7 HN                                           | -6.1   | -5.5  | -7.8   | -5.7   |
| GN9 HN                                          | 6.0    | 3.9   | N/A    | 4.4    |
| GN10 HN                                         | 7.6    | N/A   | 5.7    | 7.6    |
| GN11 HN                                         | N/A    | 3.9   | 7.8    | 7.8    |

\*=GalNAc Glycosylation

## **Supporting Information: Experimental Procedures**

### **Glycopeptide Immobilization**

The MUC2 and alpha-dystroglycan related constructs were immobilized through coupling of side chain amine of the C-terminal lysine residue to the NHS-functionalized slide. The Ac-T-( $\alpha$ -O-GalNAc)-NH-(CH<sub>2</sub>)<sub>3</sub>-NH<sub>2</sub> and Ac-[T-( $\alpha$ -O-GalNAc)]<sub>3</sub>-NH-(CH<sub>2</sub>)<sub>3</sub>-NH<sub>2</sub> (Chart IDs 19 and 20) were attached through the propylamine linker, and the other structures were coupled through the peptide *N*-terminal amino group.

### **Vaccination Protocol**

Patients were vaccinated subcutaneously three times at one week intervals, once four weeks later and then once or twice more at three month intervals as described earlier study.<sup>2</sup> The vaccines were well tolerated. Serum samples were drawn at regular intervals and tested for reactivity against MUC1 and Tn. Peak titer sera were utilized in the analyses.



**Synthesis of Ac-PTTDSTTPAPTTK-NH<sub>2</sub>, Ac-PTTDSTT( $\alpha$ -D-GalNAc)PAPTTK-NH<sub>2</sub>, (EA2) TSAPDTRPAP-NH<sub>2</sub>, and TSAPDT( $\alpha$ -D-GalNAc)RPAP-NH<sub>2</sub> (MUC1-1)**

Starting with Fmoc-PAL-PEG-PS resin (250 mg, 0.20 mmol/g), the peptides were assembled on bench-top facility in a glass vessel (5 ml) containing porous polypropylene frits. Fmoc-amino acids (4 equiv) were coupled for 2 h in the presence of HCTU (4 equiv), HOBT (4 equiv) and DIEA (6 equiv) in DMF at 25°C. Fmoc-Thr(Ac<sub>3</sub>- $\alpha$ -D-GalNAc)-OH (1.5 equiv) was double coupled for 4 h in the presence of HCTU (1.5 equiv), HOBT (1.5 equiv) and DIEA (2 equiv) in NMP at 25°C. The following Fmoc-Thr(<sup>t</sup>Bu)-OH (4 equiv) was double coupled. Fmoc removal was achieved with piperidine-DMF (1:4) for 20 min. Washings between reactions were carried out with DMF and CH<sub>2</sub>Cl<sub>2</sub>, and no intermediate capping steps were done. After complete chain assembly, *N*-acetylation was achieved by treatment with Ac<sub>2</sub>O-DMF (1:4) for 20 min. Cleavage of the peptides was achieved by treatment with TFA-H<sub>2</sub>O (19:1) and precipitated in cold ether (100 ml). Analytical RP-HPLC was performed on an Agilent system with detection at 220 nm. Samples were chromatographed at 1.0 mL/min using linear gradients of 0.1% aqueous TFA (buffer A) and 0.1% TFA in CH<sub>3</sub>CN (buffer B), from 0 to 40% buffer B over 40 min. Crude peptides and glycopeptides were purified by semi-preparative RP-HPLC on a Agilent system, using gradients which varied according to the properties of the particular sequence, and detection at 220 nm. After purification, the glycopeptides were treated with NaOMe in MeOH (pH ~9, as detected by wet litmus paper) for 6 h as monitored by analytical RP-HPLC, followed by semi-preparative HPLC of the fully deprotected material. Fractions with the desired peptides or glycopeptides were combined and lyophilized. Yields of peptides: ~60%. Yields of glycopeptides: ~40%. Yields were calculated based on the loading of the resin used. ESI-MS: Ac-PTTDSTTPAPTTK-NH<sub>2</sub>, 679.8 [M+2H]<sup>2+</sup>, 690.8 [M+H+Na]<sup>2+</sup>, t<sub>R</sub> = 16.0 min; Ac-PTTDSTT( $\alpha$ -D-GalNAc)PAPTTK-NH<sub>2</sub>, 800.3 [M+H+K]<sup>2+</sup>, 803.3 [M+2Na]<sup>2+</sup>, t<sub>R</sub> = 13.9 min. MALDI-TOF: H-TSAPDTRPAP-NH<sub>2</sub>, 1011.6 [M+H]<sup>+</sup>, t<sub>R</sub> = 12.4 min; H-TSAPDT( $\alpha$ -D-GalNAc)RPAP-NH<sub>2</sub>, 1340.5 [M+H]<sup>+</sup>. t<sub>R</sub> = 19.3 min.

## **Synthesis of APGSTAPP-NH<sub>2</sub> and APGS( $\alpha$ -D-GalNAc)T( $\alpha$ -D-GalNAc)APP-NH<sub>2</sub> (MUC1-2)**

Starting with Rink Amide AM (180 mg, 0.36 mmol/g), the first three amino-acid derivatives were assembled on an ABI 433A peptide synthesizer, by sequential couplings of Fmoc-amino acid derivatives (4 equiv) using standard protocol in the presence of HCTU (4 equiv), HOBt (4 equiv) and DIEA (8 equiv). Then, the peptide APP-resin (50 mg) was elongated by double couplings of Fmoc-Thr(Ac<sub>3</sub>- $\alpha$ -D-GalNAc)-OH (1.5 equiv) and Fmoc-Ser(Ac<sub>3</sub>- $\alpha$ -D-GalNAc)-OH (1.5 equiv) manually for 12 h in the presence of HATU (1.5 equiv), HOBt (1.5 equiv) and DIEA (2 equiv) in DMF at 25°C respectively. The remaining three amino-acid derivatives (4 equiv) were coupled manually. The peptide was cleaved from resin by TFA-H<sub>2</sub>O (19:1, 2 ml) and precipitated in cold ether (100 ml). After purification, the peptide APGS(Ac<sub>4</sub>- $\alpha$ -D-GalNAc)T(Ac<sub>4</sub>- $\alpha$ -D-GalNAc)APP-NH<sub>2</sub> was treated with NaOMe in MeOH (pH ~9, as detected by wet litmus paper) for 6 h as monitored by analytical RP-HPLC. The target product was obtained by purification on semi-preparative RP-HPLC. The structure was confirmed by MALDI-TOF. After synthesis on ABI 433A peptide synthesizer, peptide APGSTAPP was cleaved from the resin by TFA/H<sub>2</sub>O/triisopropylsilane (38:1:1), followed by purification on semi-preparative RP-HPLC.

### **Structure Calculation Protocol**

Starting from an extended structure, peptide backbone and glycosidic linkage torsion angles were randomized and the structure was then subjected to an initial minimization consisting of four iterations of 2000 steps each. The first iteration included only bond length and angle terms, the second iteration added torsion terms, the third added improper torsion terms and the fourth iteration added a repulsive van der Waals term. After initial minimization, the van der Waals term was turned off, and NMR derived distance and torsion restraints were activated. The system was then warmed to 50,000 K over 2 ps, which was followed by 30ps of dynamics and 32ps of dynamics with ramped repulsive van der Waals. This was followed by 16ps of slow cooling to 0 K and 2000 steps of final Cartesian minimization. Electrostatic terms were turned off for the duration of the

calculations. All simulated annealing dynamics stages utilized a time-step of 2 fs. An ensemble of 100 structures was generated for each variant, which were then evaluated for restraint violations and deviations from ideal geometry based on the following criteria: no distance restraint violations greater than 0.25Å, no backbone torsion restraint violations greater than 5.0°, no bond length constraint violations greater than 0.05Å and no angle or improper torsion constraint violations greater than 5.0°. All structure determination calculations utilized Torsion Angle Dynamics<sup>3</sup> along with the Internal Variable Module<sup>4</sup>. Throughout the calculations, proline and GalNAc rings were held rigid, with the GalNAc rings held in the chair conformation.

### Supporting Information References

- (1) Piotto M, Saudek V, Sklenar V. (1992) Gradient-Tailored Excitation for Single-Quantum NMR-Spectroscopy of Aqueous-Solutions. *J Biomol NMR* 2, 661-665.
- (2) T., Ragapathi, G., Bhuta, S., Clausen, H., Norton, L., Houghton, A. N., and Livingston, P. O. (2001) Preliminary data: Vaccination with glycosylated mucin1-keyhole limpet hemocyanin conjugate plus the immunological adjuvant qs-21 in breast cancer patients, *Proceedings of the American Society of Clinical Oncology* 20, 271a.
- (3) Stein, E.G., Rice, L.M. and Brunger, A.T. (1997) Torsion-angle molecular dynamics as a new efficient tool for NMR structure calculation. *J. Magn. Reson.*, 124, 154-164.
- (4) Schwieters, C.D. and Clore, G.M. (2001) Internal coordinates for molecular dynamics and minimization in structure determination and refinement. *J. Magn. Reson.*, 152, 288-302.
